# Supplementary material for: Differences in microbial diversity, composition and function during V(v) release and reduction in nitrate–V(v) co-contaminated water from liquid carbon sources
Source: Royal Society of Chemistry journal article supplement (doi:10.1039/d2ew00979j), 2023-01-01
Supplement: d2ew00979j1.pdf [file d2ew00979j1.pdf]

**Differences in microbial diversity, composition and function during  
V(V) release and reduction in nitrate-V(V) co-contaminated water by  
under liquid carbon sources**

Haishuang Wang<sup>a</sup>, Nan Chen<sup>a\*</sup>, Chuanping Feng<sup>a</sup>, Yang Deng<sup>b</sup>, Wang Lu<sup>a</sup>

<sup>a</sup> *School of Water Resources and Environment, MOE Key Laboratory of Groundwater Circulation and Environmental Evolution, China University of Geosciences (Beijing), Beijing, 100083, China*

<sup>b</sup> *Department of Environmental Engineering, College of Environmental Sciences and Engineering, Peking University, Beijing, 100871, China*

---

\* Corresponding Author:

chennan@cugb.edu.cn (N. Chen), Phone: +86-10-82322281, Fax: +86-10-82321081.

The following equations are used for the first-level dynamics calculation and the zero-level dynamics calculation<sup>1</sup>.

Zero-order kinetic module:

$$C_t = C_0 - kt$$

First-order kinetic module:

$$C_t = C_0 e^{-kt}$$

where  $C_t$  and  $C_0$  indicate the pollutants concentrations ( $\text{mg N}\cdot\text{L}^{-1}$ ) in the  $t$ , and  $k$  is the kinetic constant.

## References:

- 1 S. Sun, Y.-N. Hou, C. Huang, H. M. A. Sharif, J. Guo, N. Ren and A.-J. Wang, Acute responses of bio-denitrification to short-term clopyralid exposure: Kinetic analysis and biological mechanisms, *Chemical Engineering Journal*, 2023, **457**, 141145.

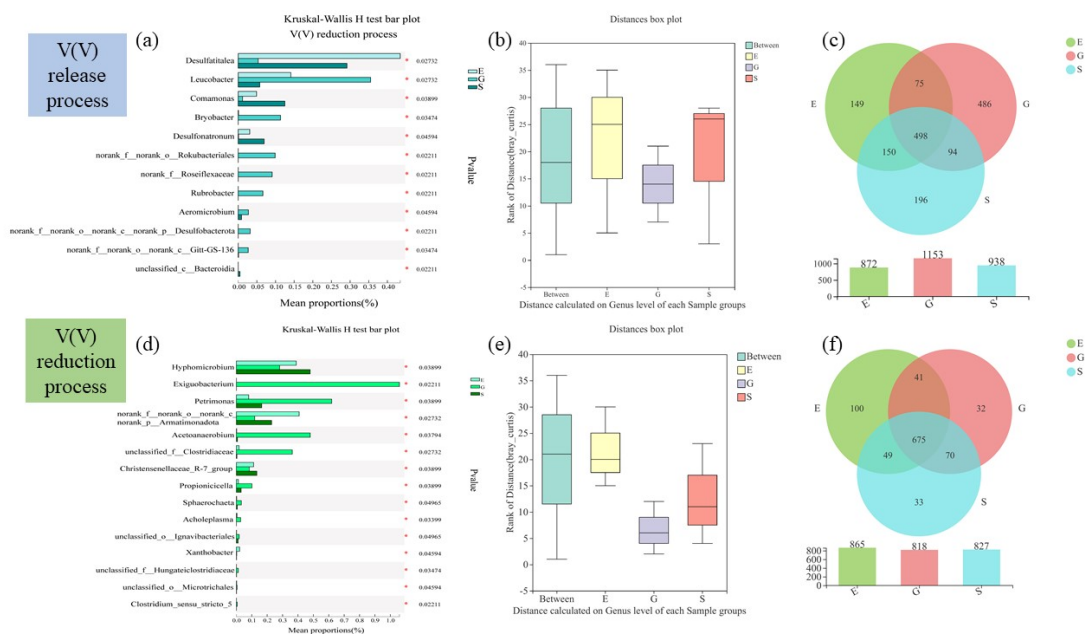

**Fig. S1.** Significant difference tests between groups (a) (d), Analysis of similarities (b) (e), the Venn plot (c) (f) based on different carbon source-mediated systems.

### Single Nitrate system

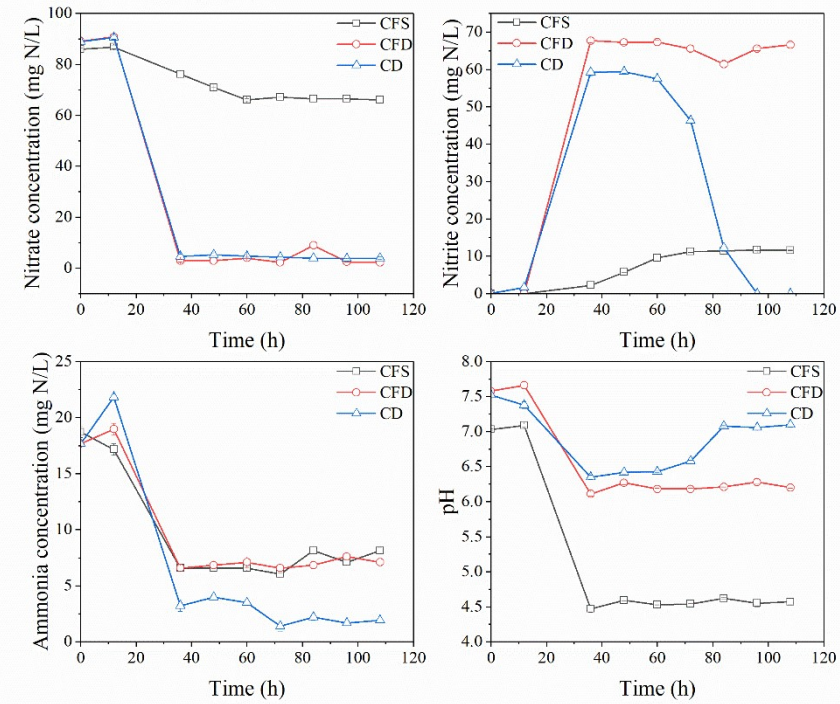

### Single V(V) system

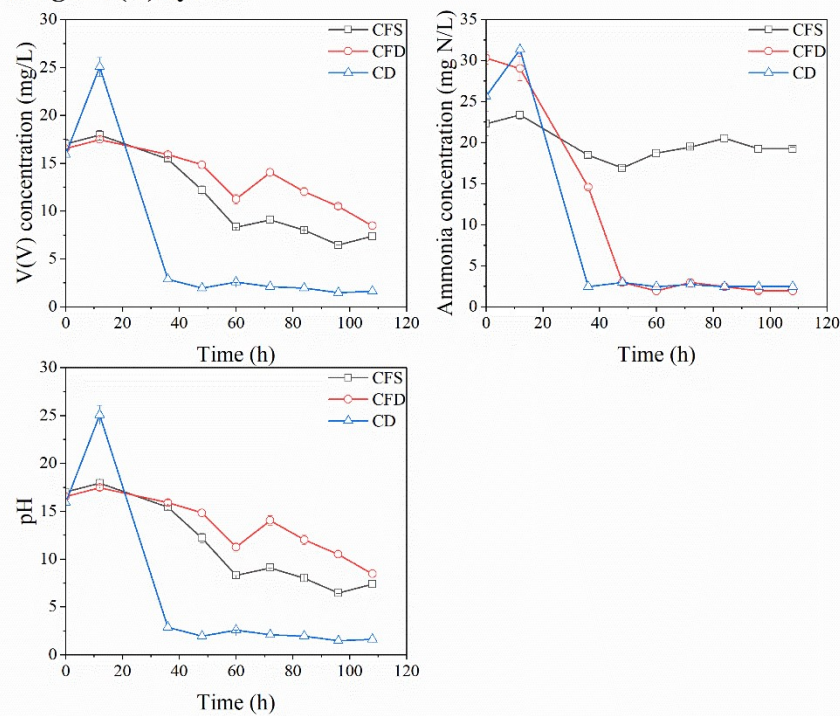

Fig. S2 the variation of nitrate-N, V(V), nitrite-N, Ammonia-N and pH concentration in all bio-reactors. (CFS stands for extracellular enzymes, CFE is related to intracellular enzymes, and CD corresponds to membrane-related enzymes.)

### Vanadium release process

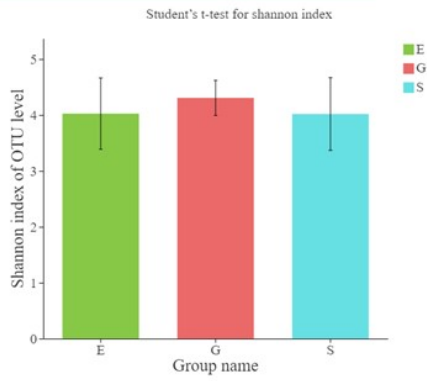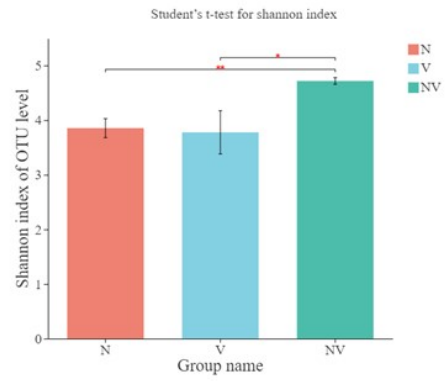

### Vanadium reduction process

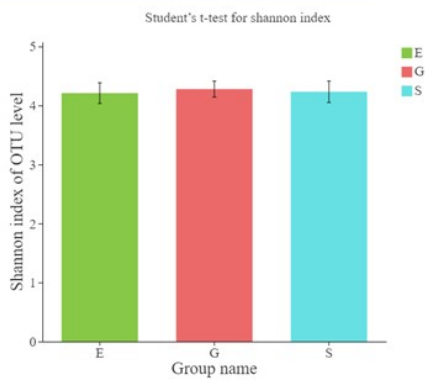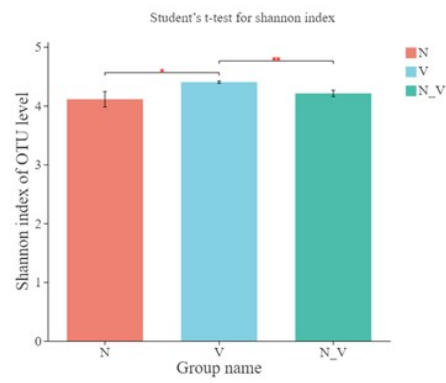

Fig. S3. Student's t-test for shannon index in V(V) release process and V(V) reduction process based on pollutants type and carbon source type.

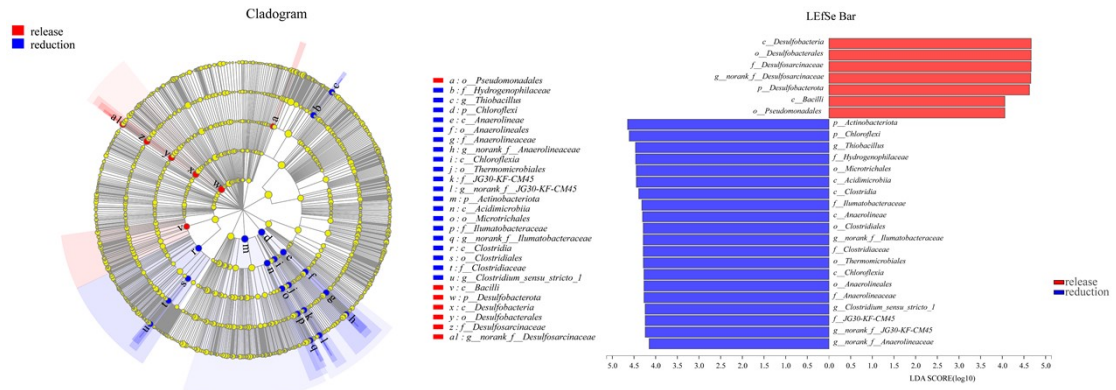

Fig. S4. Lefse multi-level species difference discriminant analysis (logarithmic LDA score = 2)

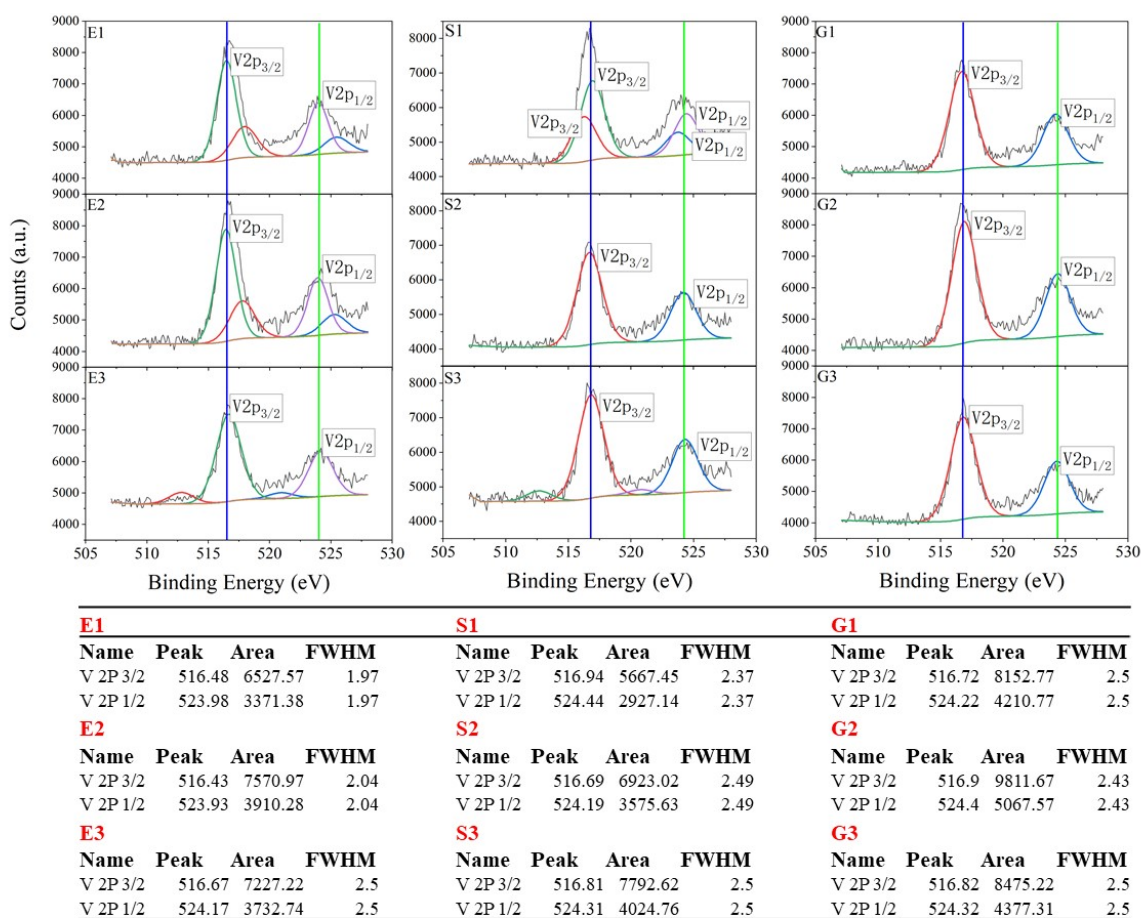

Fig. S5. XPS spectrum analysis based on different carbon source.

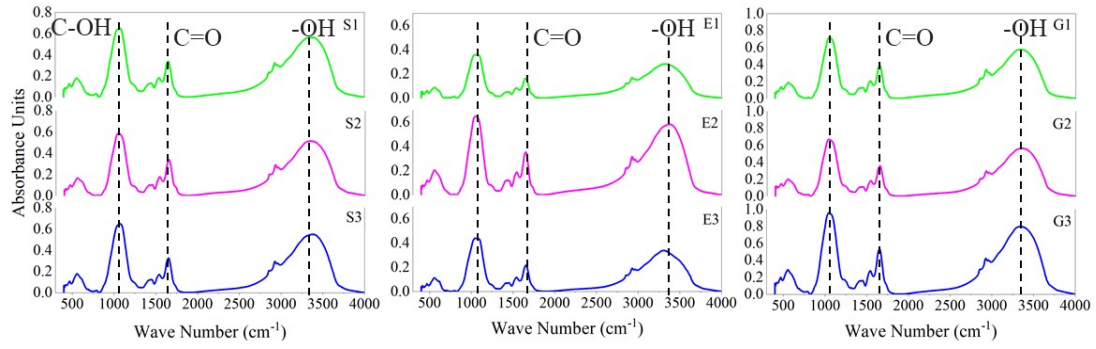

Fig. S6. FT-IR of sodium acetate (S), ethanol (E) and glucose (G) mediated bio-reactors

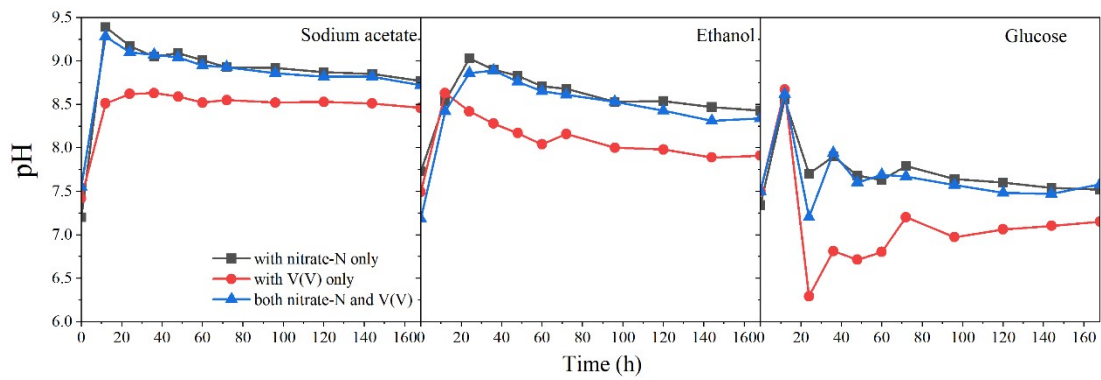

Fig. S7 Variation of pH in different liquid carbon source systems.

Table S1 The zero-order and first-order reaction kinetics of V(V) reduction by enzymes at different positions

| Location | equation               | k constant | R <sup>2</sup> |
|----------|------------------------|------------|----------------|
| CFS      | $y = 0.0099x - 0.1187$ | 0.0099     | 0.9365         |
| CFE      | $y = 0.0059x - 0.1215$ | 0.0059     | 0.8477         |
| CD       | $y = 0.0187x + 0.6262$ | 0.0187     | 0.74           |



Table S2 the alpha-diverstiy index in V(V) release process (0) and V(V) reduction process (1)

| Sample\Estimators | Sobs | Shannon  | Simpson  | Ace      | chao     |
|-------------------|------|----------|----------|----------|----------|
| E1_0              | 590  | 3.840083 | 0.076838 | 638.0943 | 648.4531 |
| E2_0              | 549  | 3.514768 | 0.094079 | 732.2761 | 738.8767 |
| E3_0              | 431  | 4.701028 | 0.026802 | 436.9678 | 436      |
| S1_0              | 628  | 3.70507  | 0.086232 | 800.4542 | 787.6111 |
| S2_0              | 574  | 3.60744  | 0.102161 | 715.2031 | 707.5921 |
| S3_0              | 587  | 4.766556 | 0.035208 | 590.4333 | 592.0556 |
| G1_0              | 564  | 4.041508 | 0.060123 | 630.4566 | 642.0455 |
| G2_0              | 581  | 4.230865 | 0.042862 | 606.5837 | 619.8864 |
| G3_0              | 791  | 4.640305 | 0.038026 | 799.9812 | 802.0222 |
| E1_1              | 583  | 4.026283 | 0.055903 | 633.8793 | 658.566  |
| E2_1              | 709  | 4.388143 | 0.0289   | 884.6092 | 872.6538 |
| E3_1              | 578  | 4.221963 | 0.034582 | 650.0658 | 676.2787 |
| S1_1              | 660  | 4.038344 | 0.054939 | 831.1014 | 805      |
| S2_1              | 731  | 4.405914 | 0.03302  | 854.5858 | 870.3596 |
| S3_1              | 685  | 4.25978  | 0.035832 | 796.503  | 796.913  |
| G1_1              | 668  | 4.257292 | 0.040299 | 813.5241 | 791.8462 |
| G2_1              | 678  | 4.427622 | 0.031024 | 820.4065 | 825.0652 |
| G3_1              | 675  | 4.155144 | 0.042225 | 816.6206 | 799.5566 |
